# Supplementary material for: Gene Expression Trajectories from Normal Nonsmokers to COPD Smokers and Disease Progression Discriminant Modeling in Response to Cigarette Smoking
Source: Hindawi journal article supplement (doi:10.1155/2022/9354286), 2022-09-14
Supplement: f1 [file 9354286.f1.zip]

**A GO-GSE5058**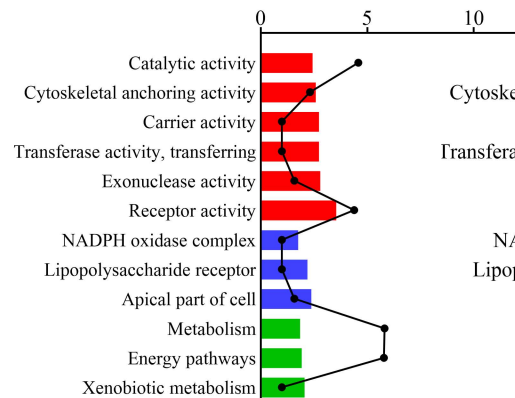**B GO-GSE5060**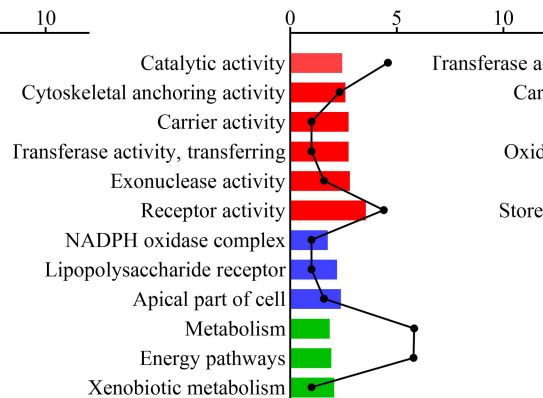**C GO-GSE8545**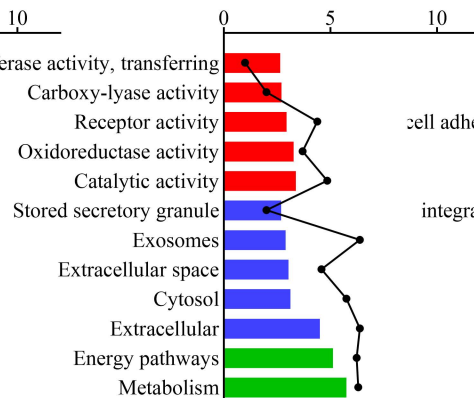**D GO-GSE10006**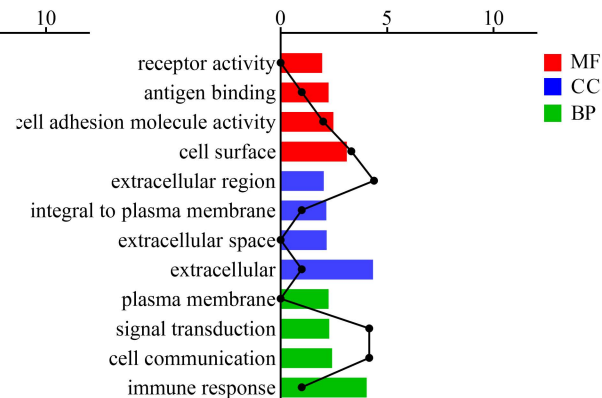**E GO-GSE11784**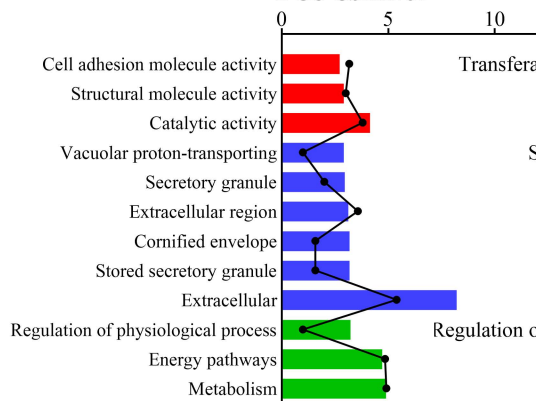**F GO-GSE11906**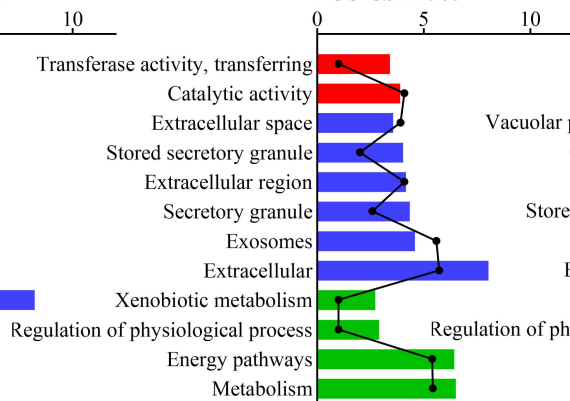**G GO-GSE19407**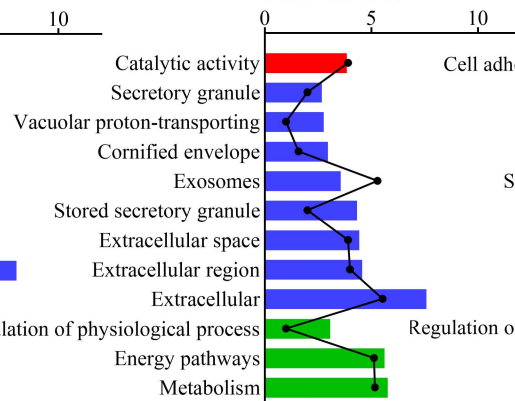**H GO-GSE20257**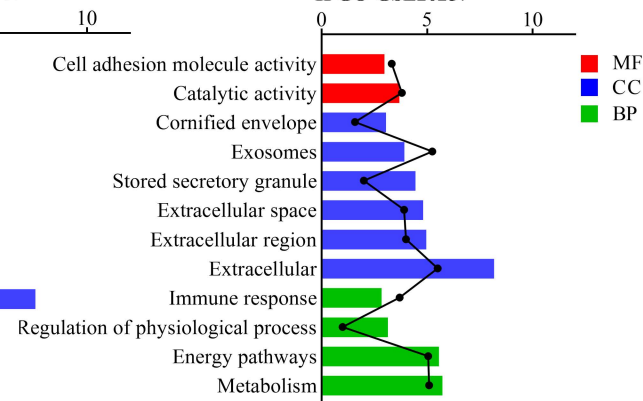

□ log2(Gene number) ● -log10(Pvalue)

MF  
CC  
BPMF  
CC  
BP
