# Supplementary figures and images for: Gene Expression Trajectories from Normal Nonsmokers to COPD Smokers and Disease Progression Discriminant Modeling in Response to Cigarette Smoking
Source: Hindawi journal article supplement (doi:10.1155/2022/9354286), 2022-09-14

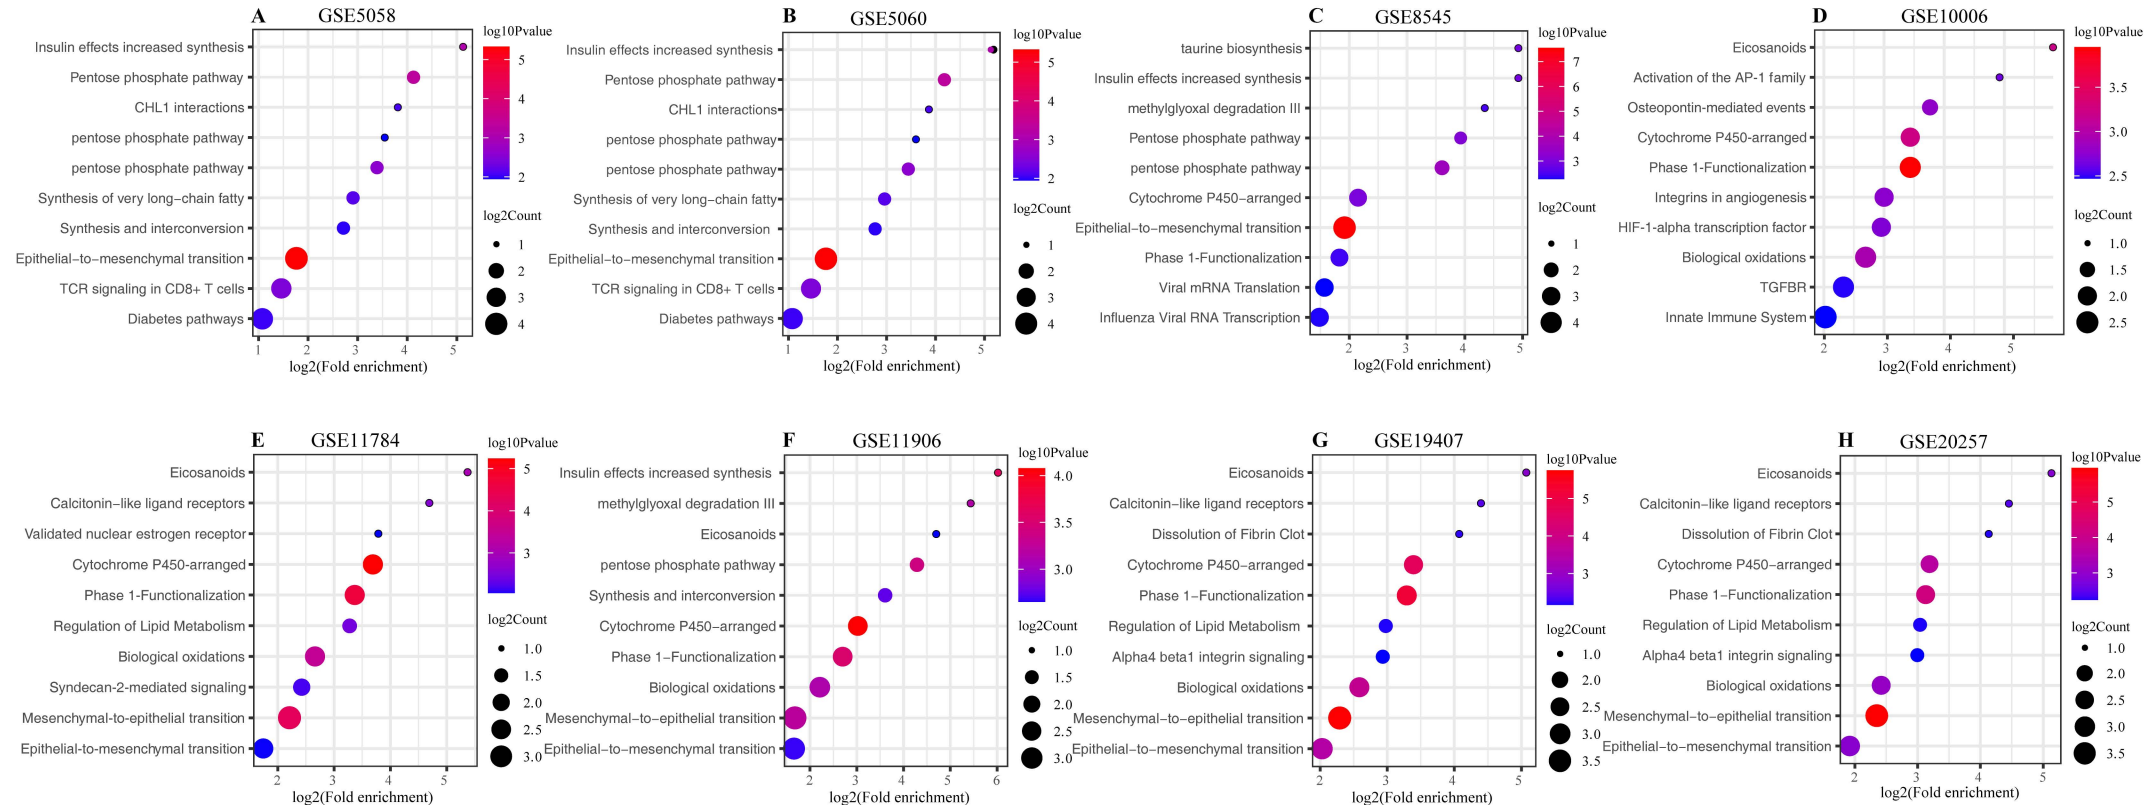

Supplement: f1 [file 9354286.f1.zip]

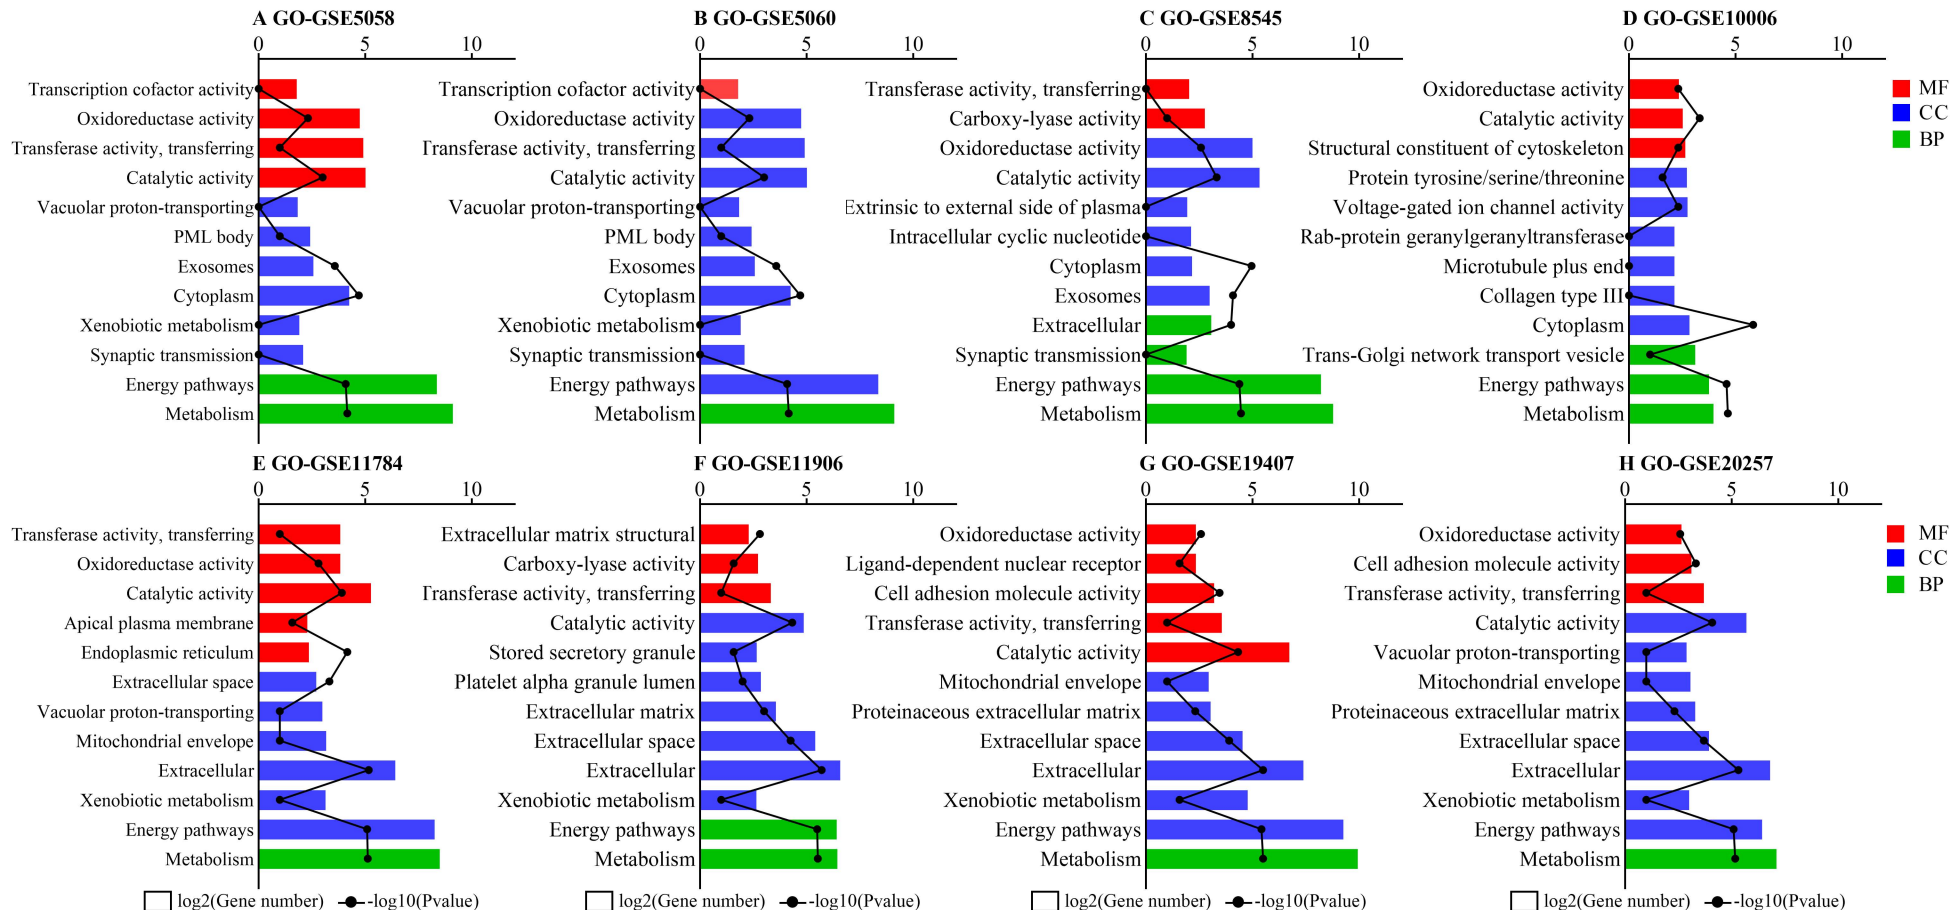

Supplement: f1 [file 9354286.f1.zip]

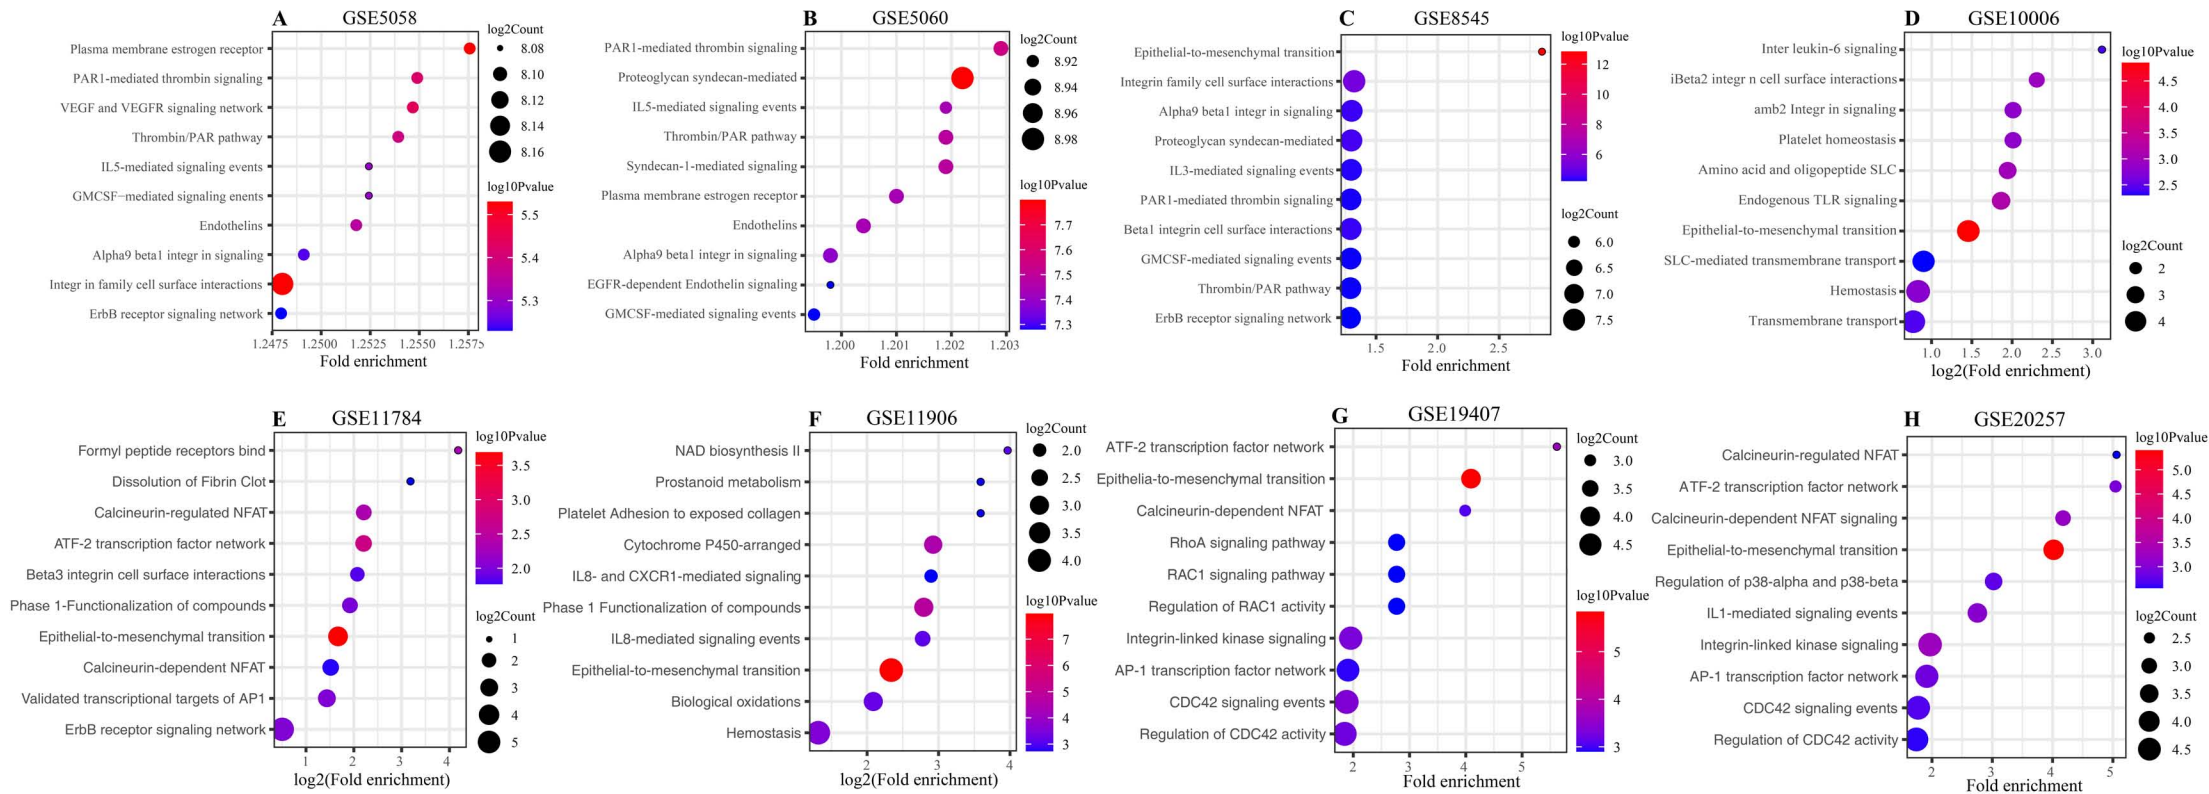

Supplement: f1 [file 9354286.f1.zip]

**A****COPD vs CTLsm**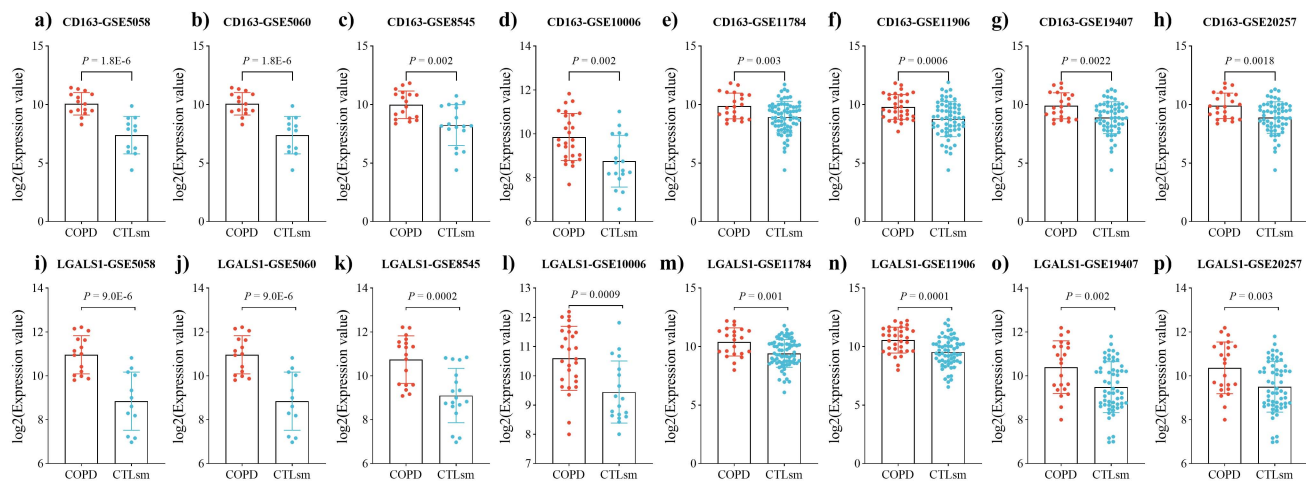**B****COPD vs CTLnsm**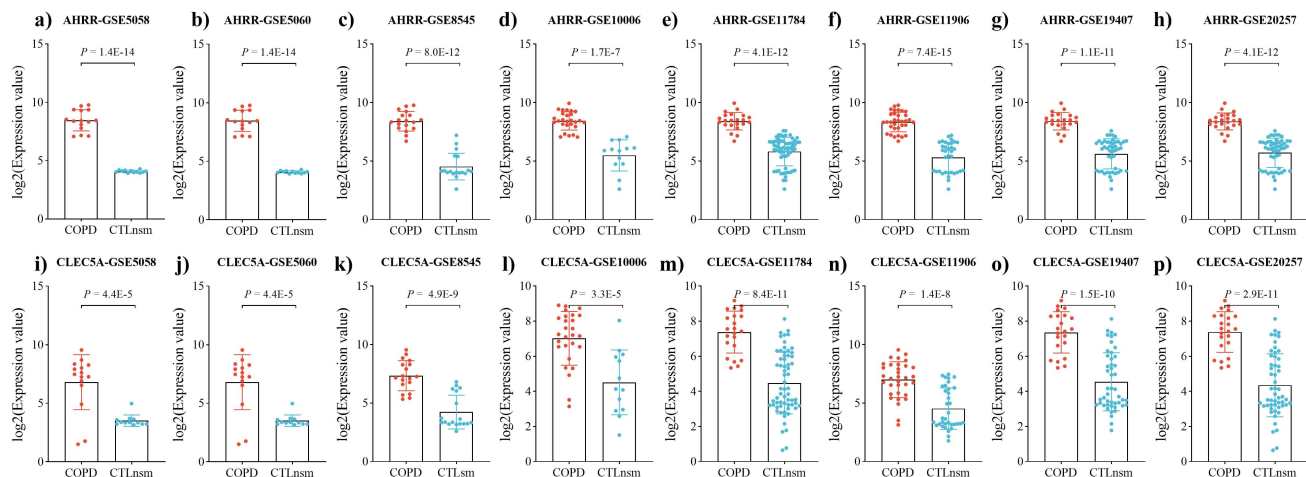**C****CTLsm vs CTLnsm**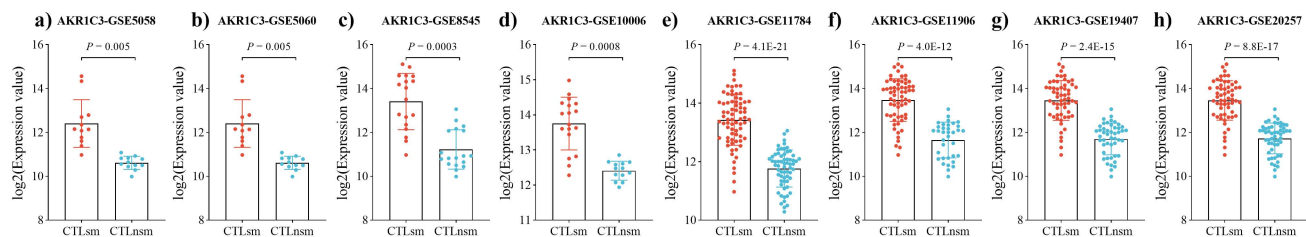

Supplement: f1 [file 9354286.f1.zip]

**A. COPDsm vs CTLsm**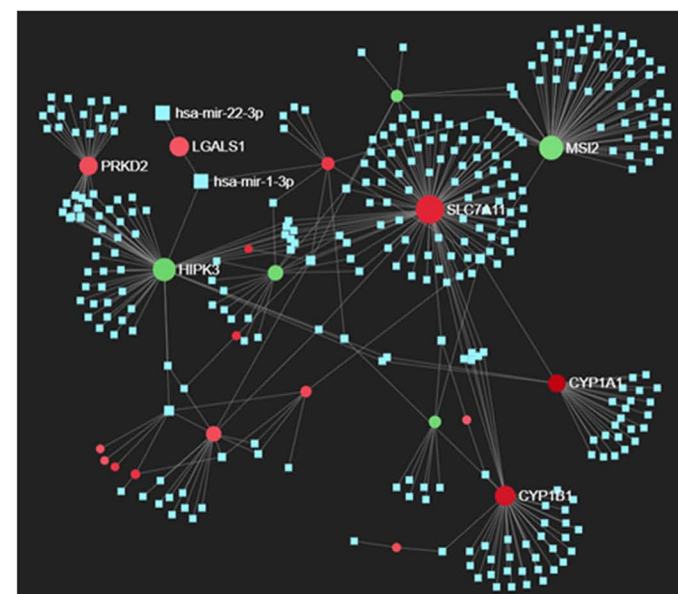**B. COPDsm vs CTLnsm**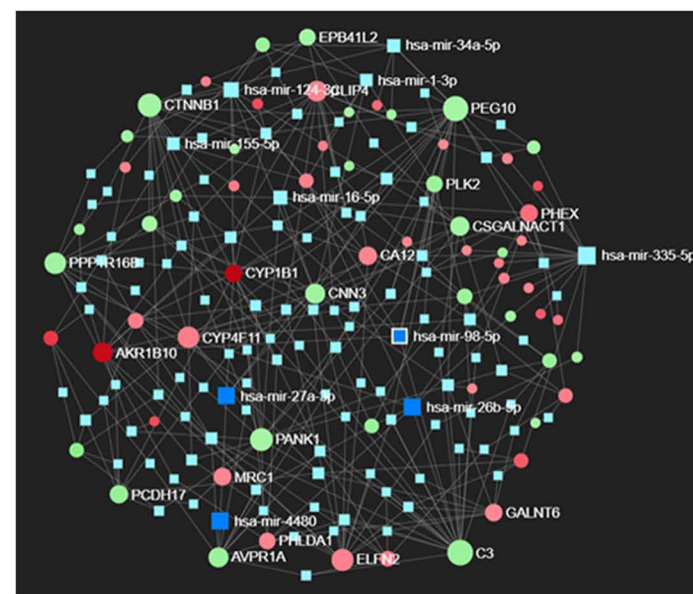**C. CTLsm vs CTLnsm**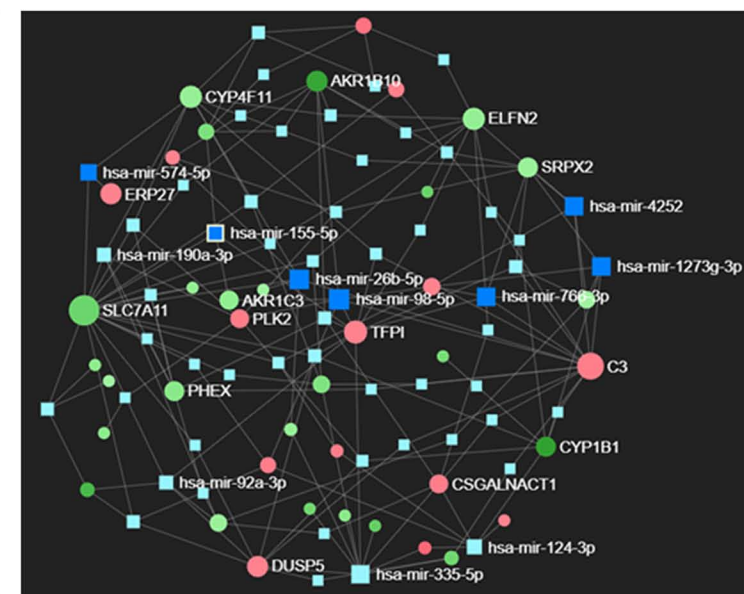**D. CS6m vs CS3m**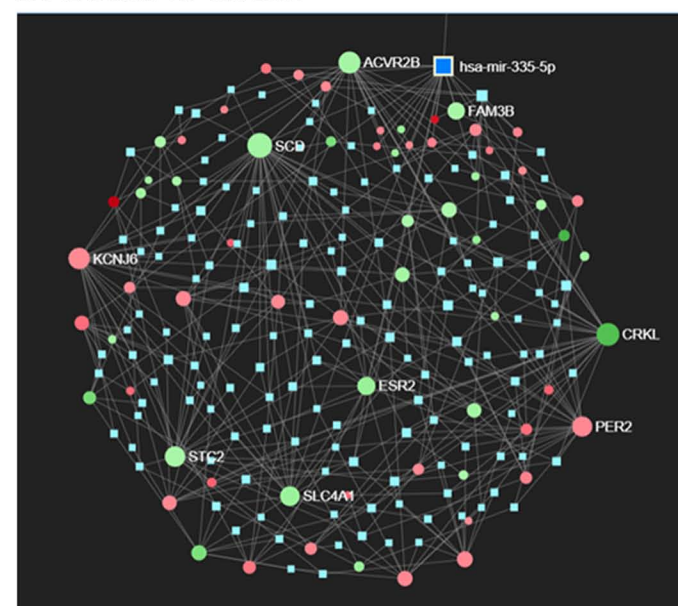**E. CS6m vs CS0m**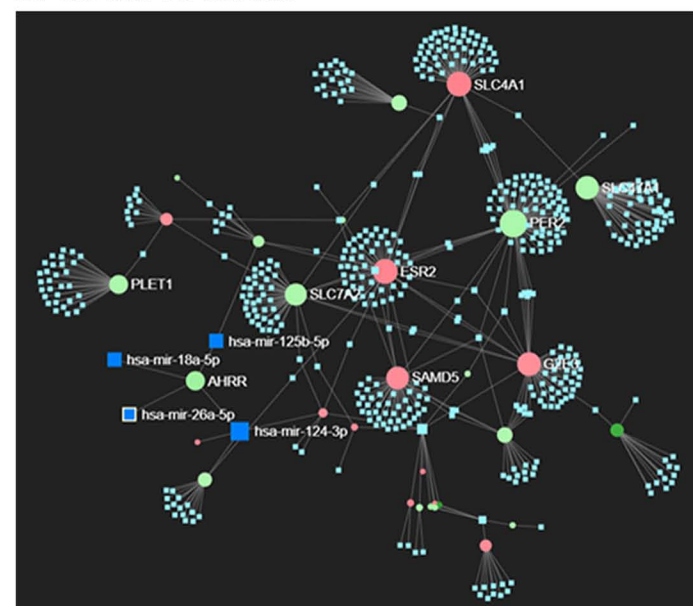**F. CS3m vs CS0m**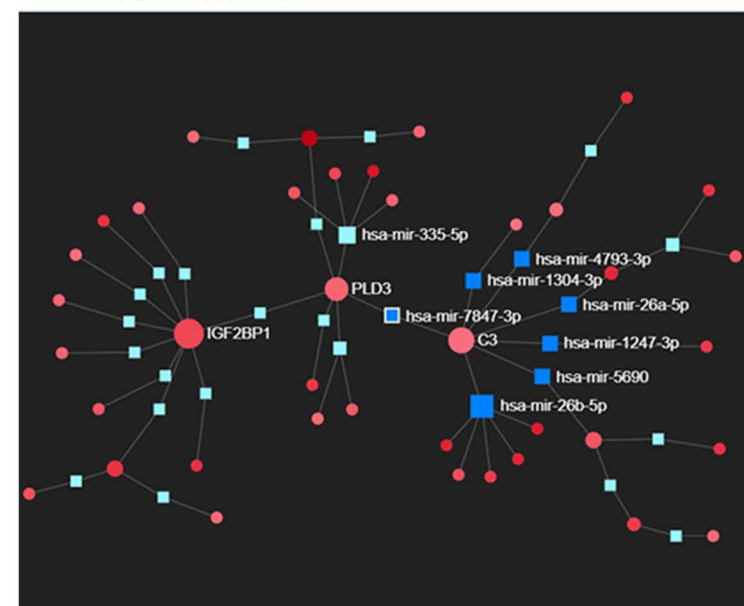

Supplement: f1 [file 9354286.f1.zip]

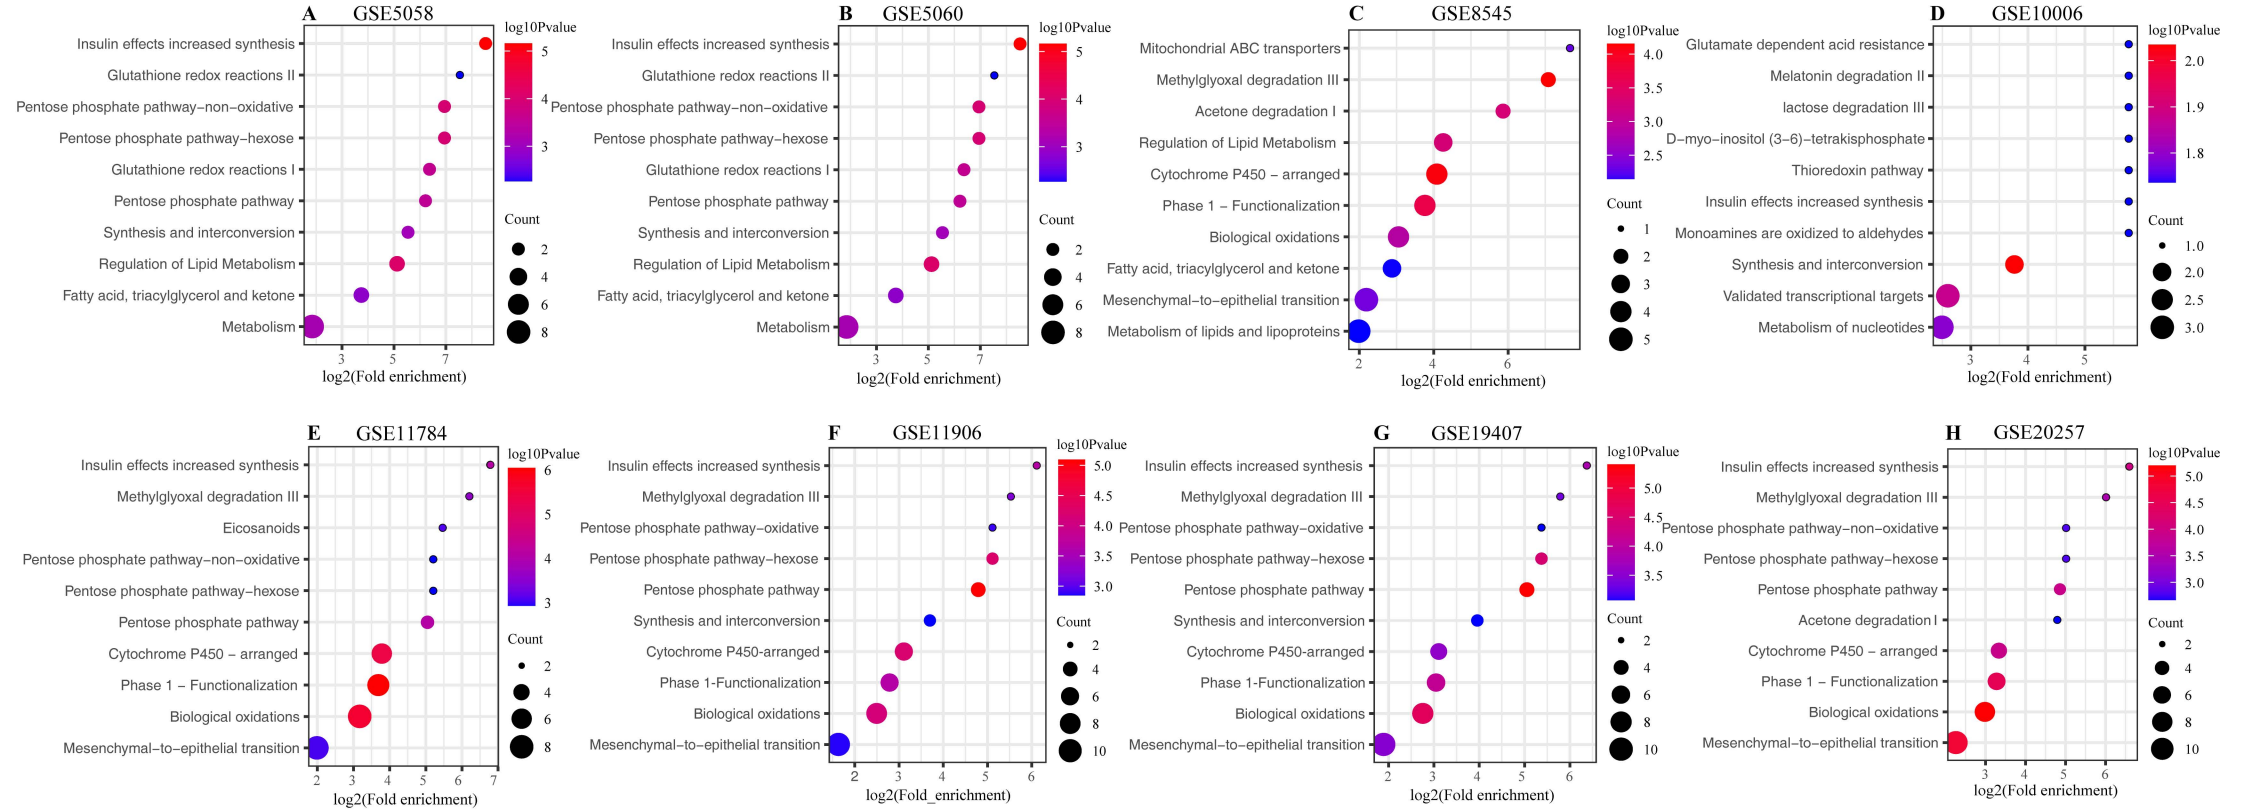

Supplement: f1 [file 9354286.f1.zip]

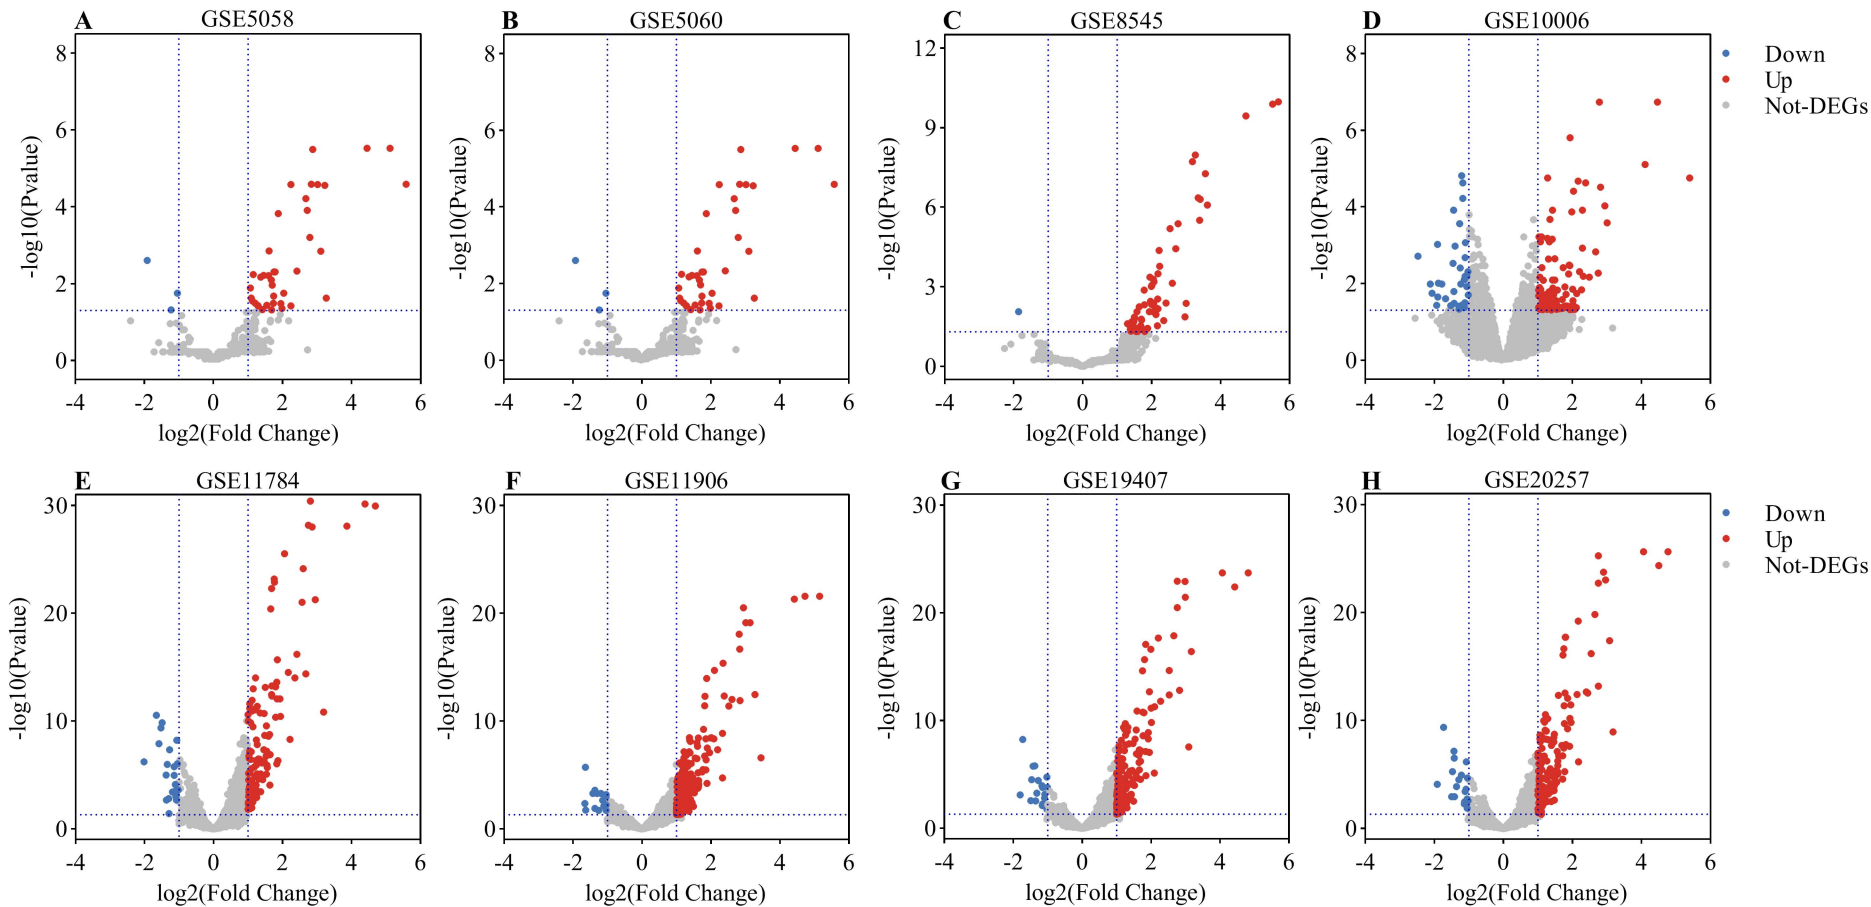

Supplement: f1 [file 9354286.f1.zip]

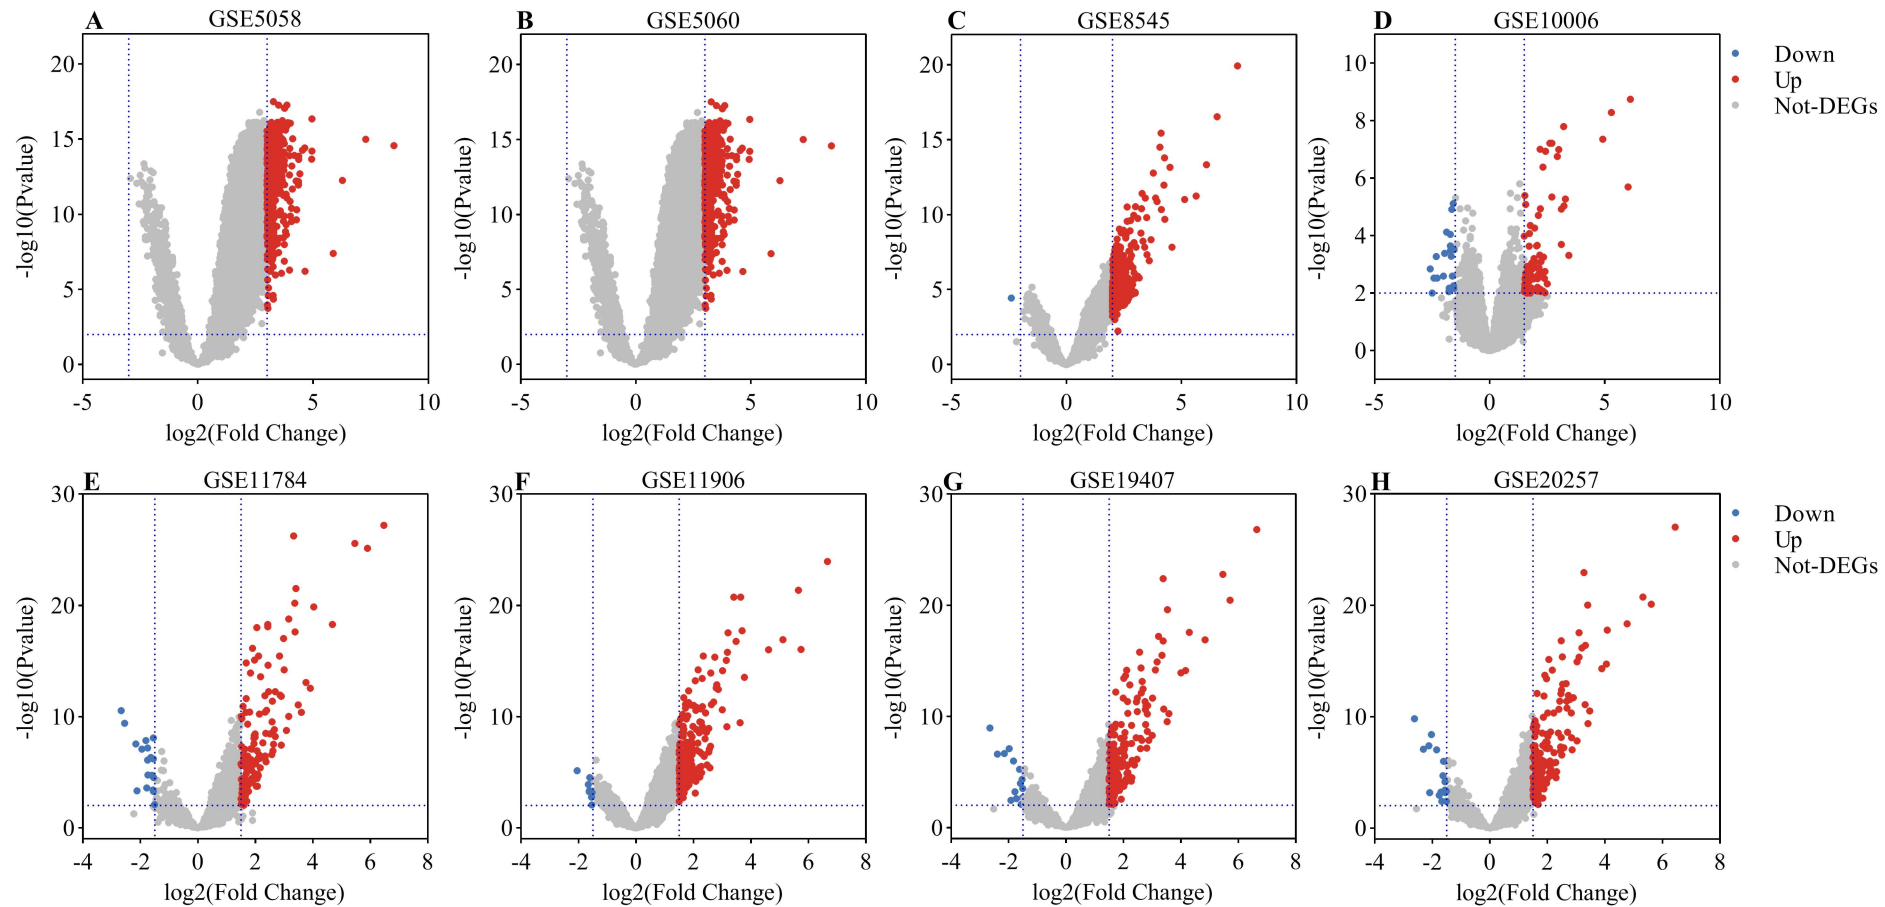

Supplement: f1 [file 9354286.f1.zip]

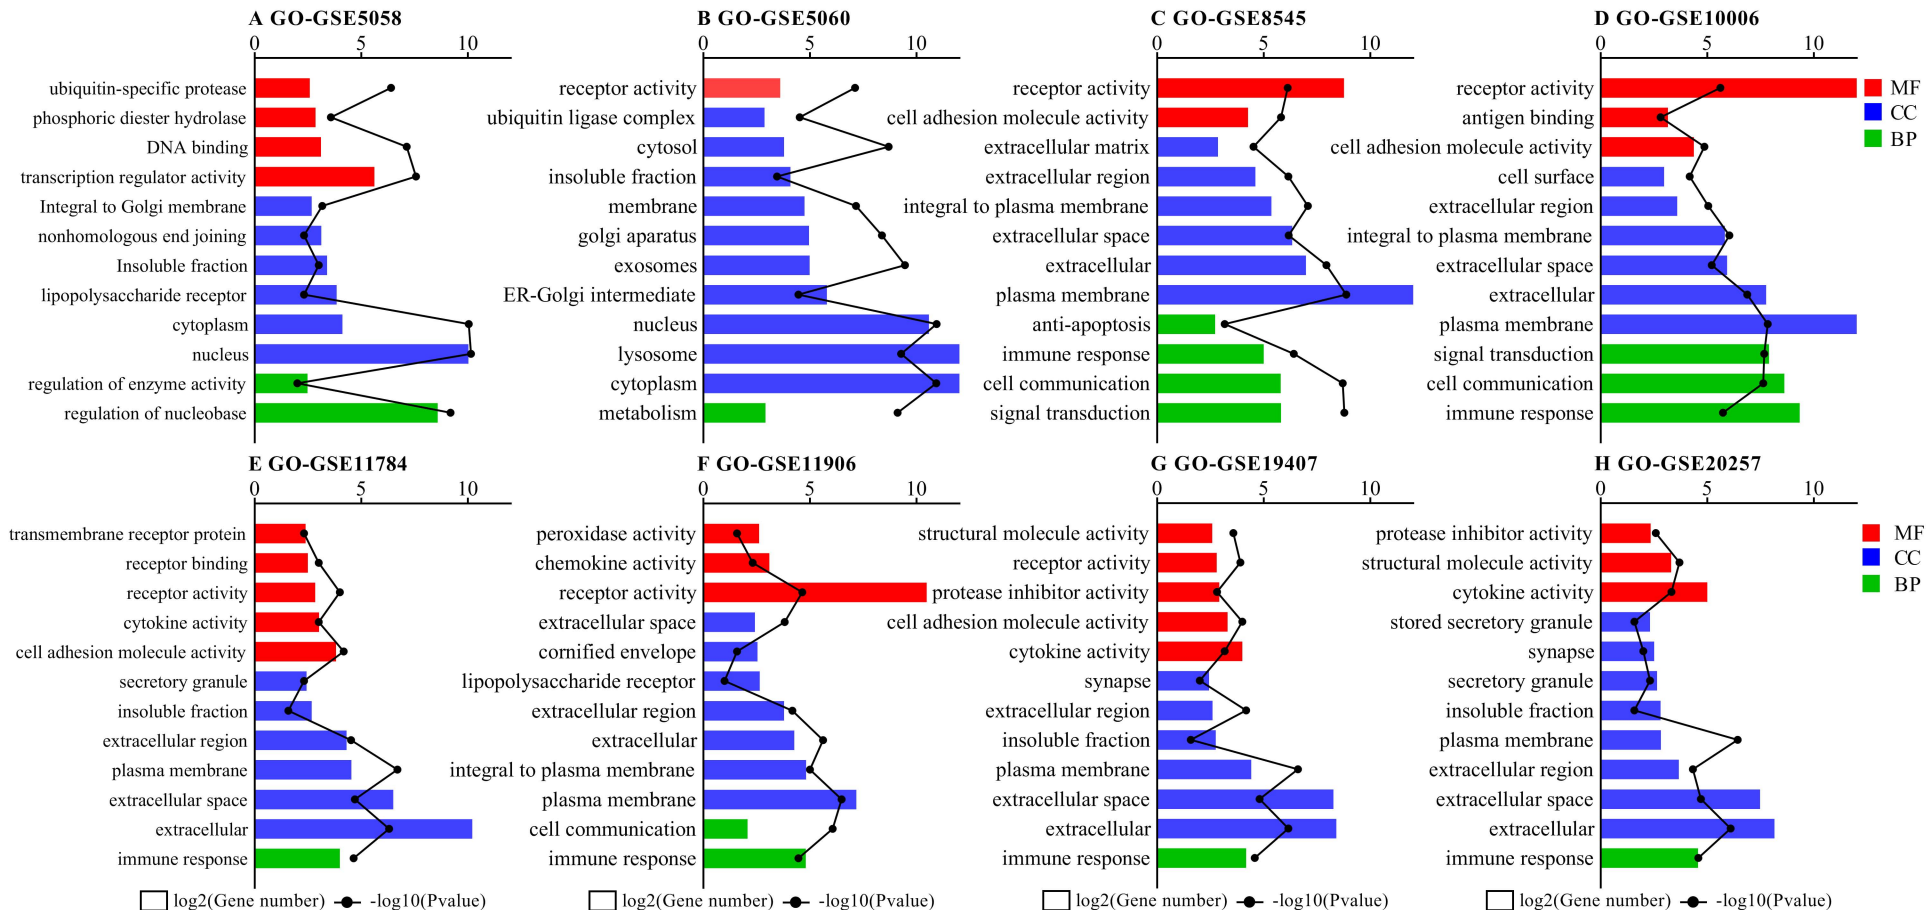

Supplement: f1 [file 9354286.f1.zip]

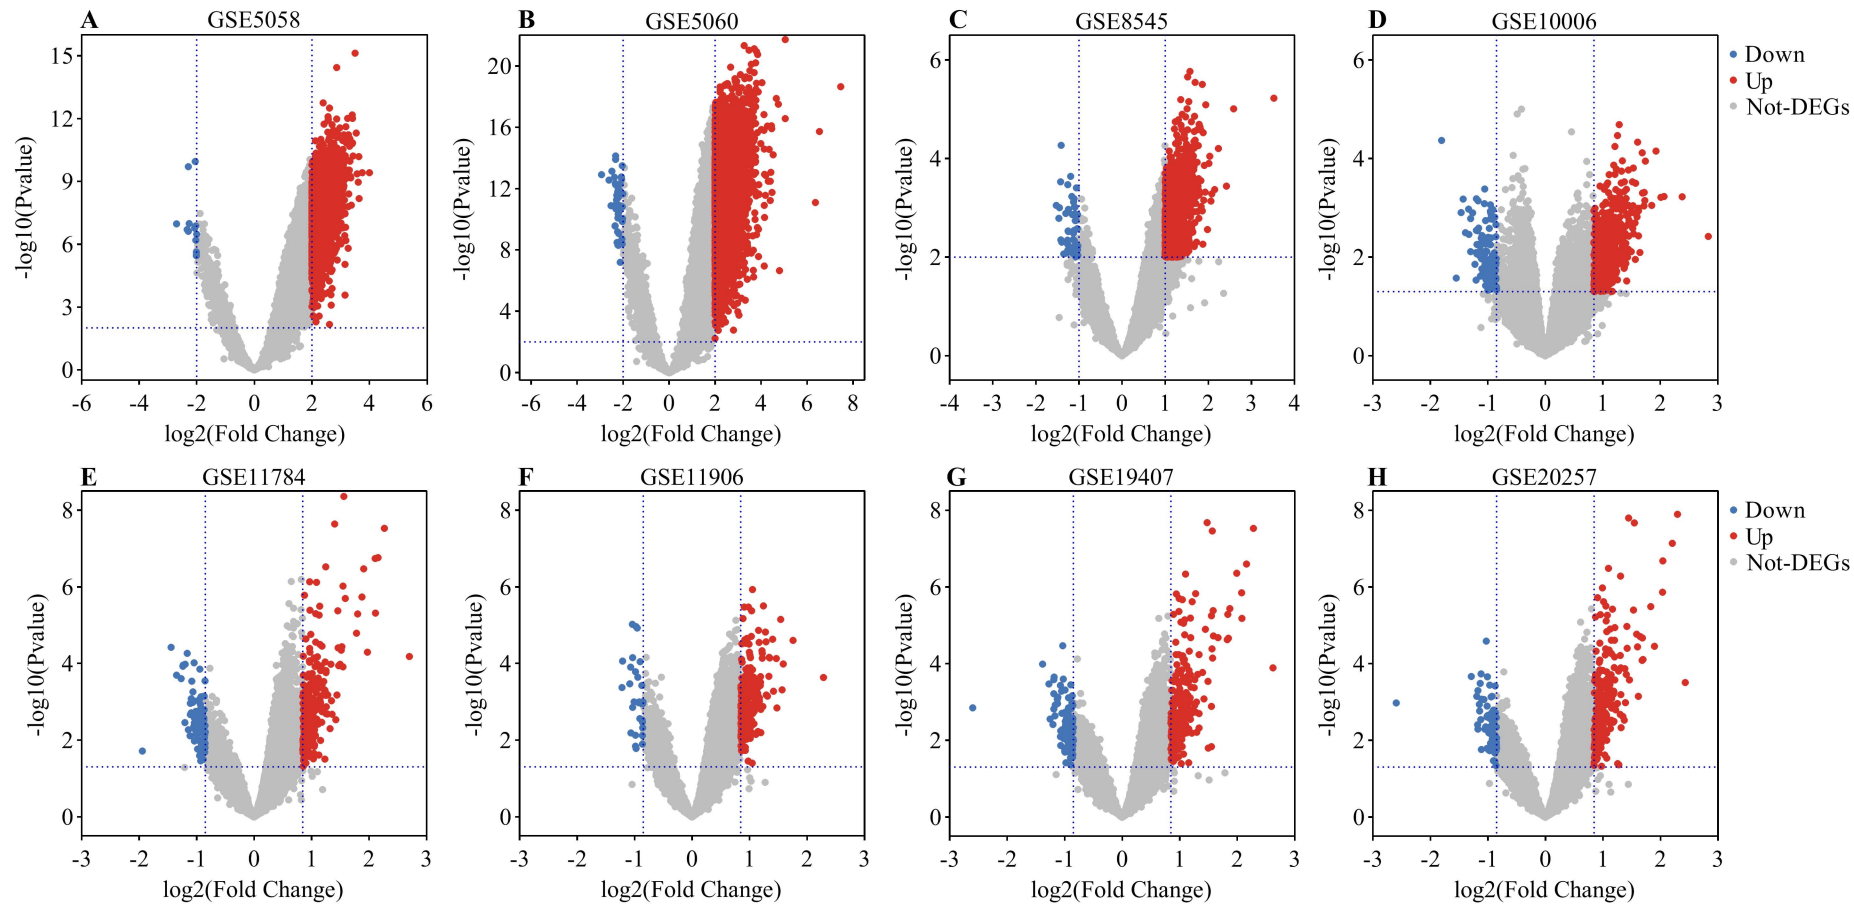

Supplement: f1 [file 9354286.f1.zip]
